# Supplementary material for: Global Prevalence of Mental Disorders Due to Covid-19 In the Central Asia: A Systematic Analysis of The Global Burden of Disease Study From 1990 to 2019
Source: Research Square preprint supplement (doi:10.21203/rs.3.rs-3257421/v1), 2023-08-21

**Supplementary appendix**

**Global Prevalence of Mental Disorders Due to Covid-19 In the Central Asia: A Systematic Analysis of The Global Burden of Disease Study From 1990 to 2019**

**Figure S1**. Prevalence of major depressive disorder per 100 000 persons due to the COVID-19 pandemic, 1990 versus 2019


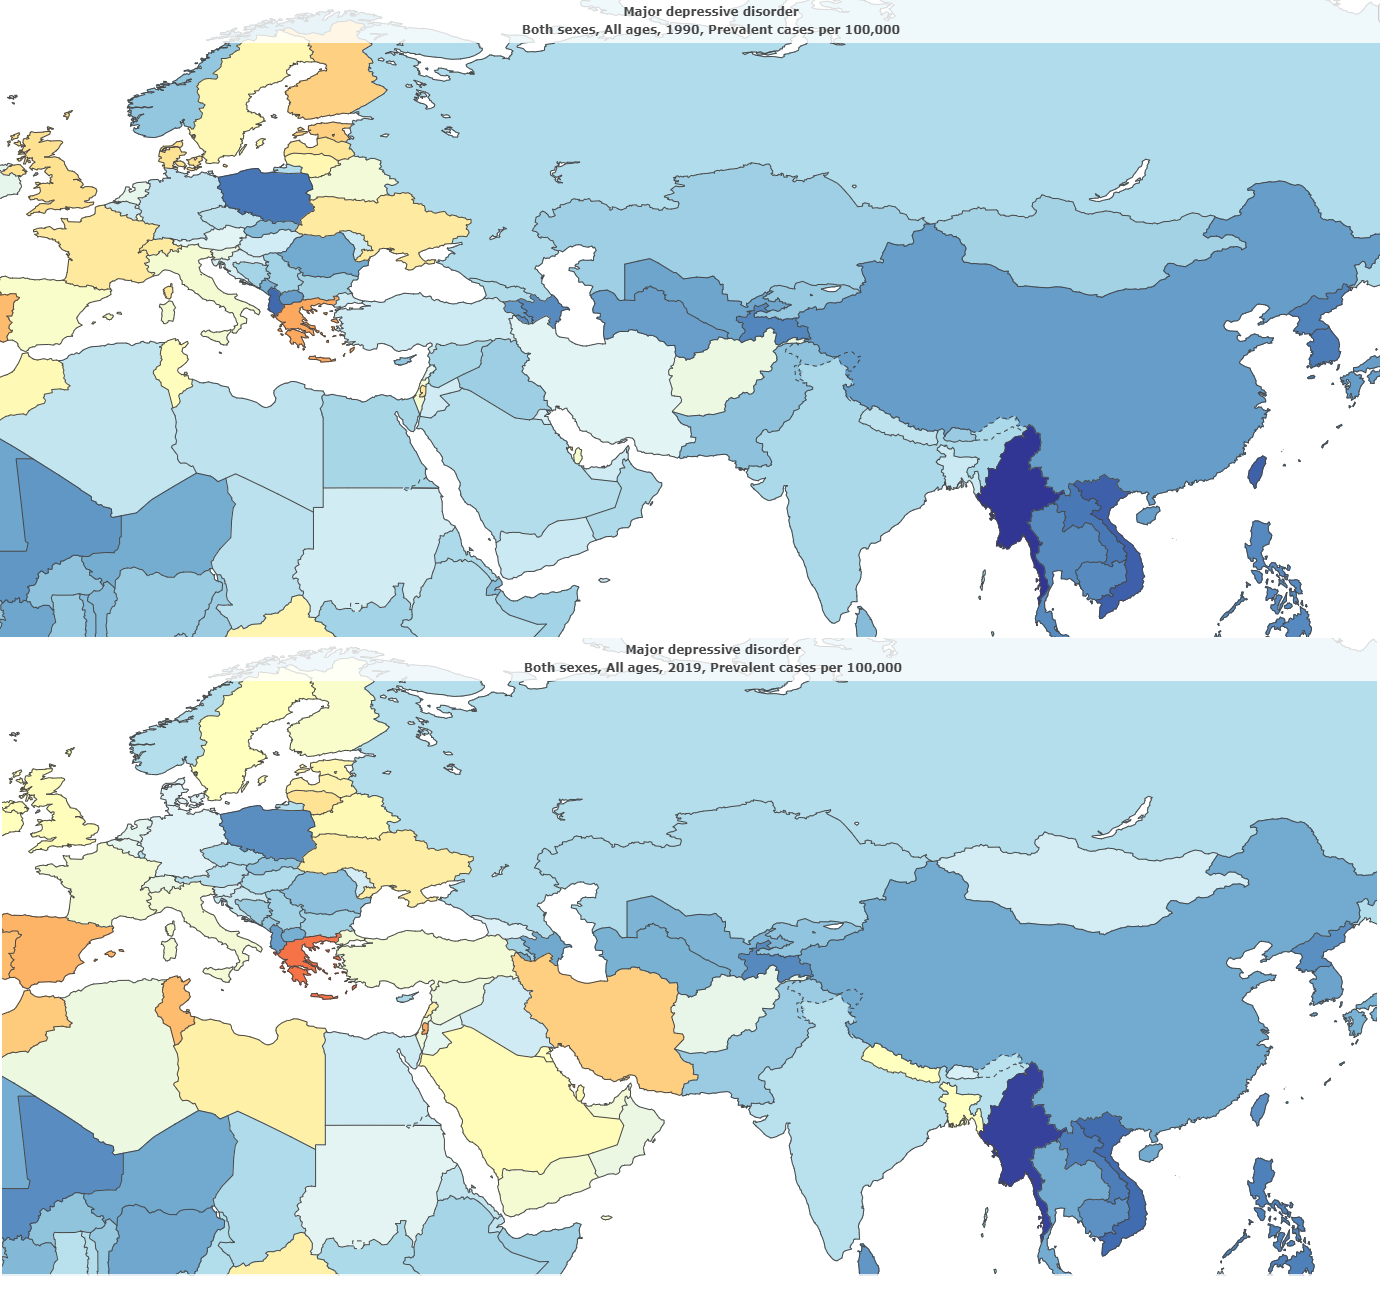


**Figure S2**. Prevalence of anxiety disorders per 100 000 persons due to the COVID-19 pandemic, 1990 versus 2019


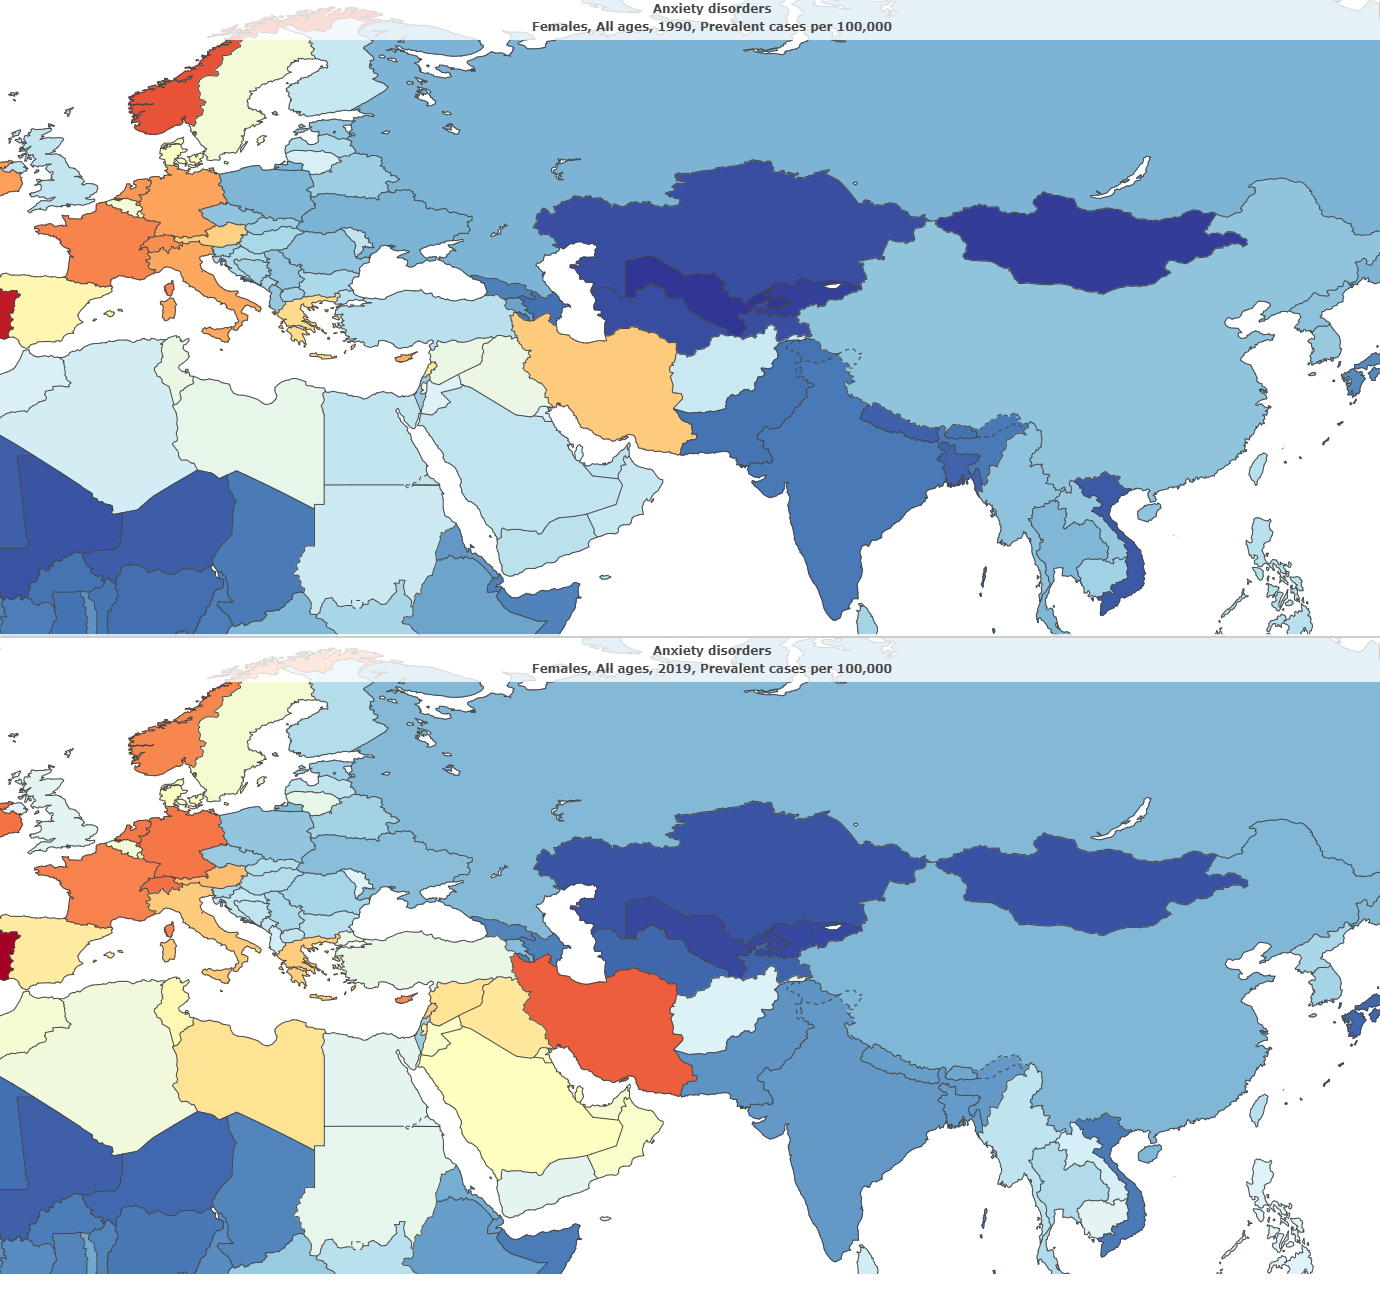


**Figure S3.** Annual % change of major depressive disorder per 100 000 persons due to the COVID-19 pandemic, 1990 versus 2019


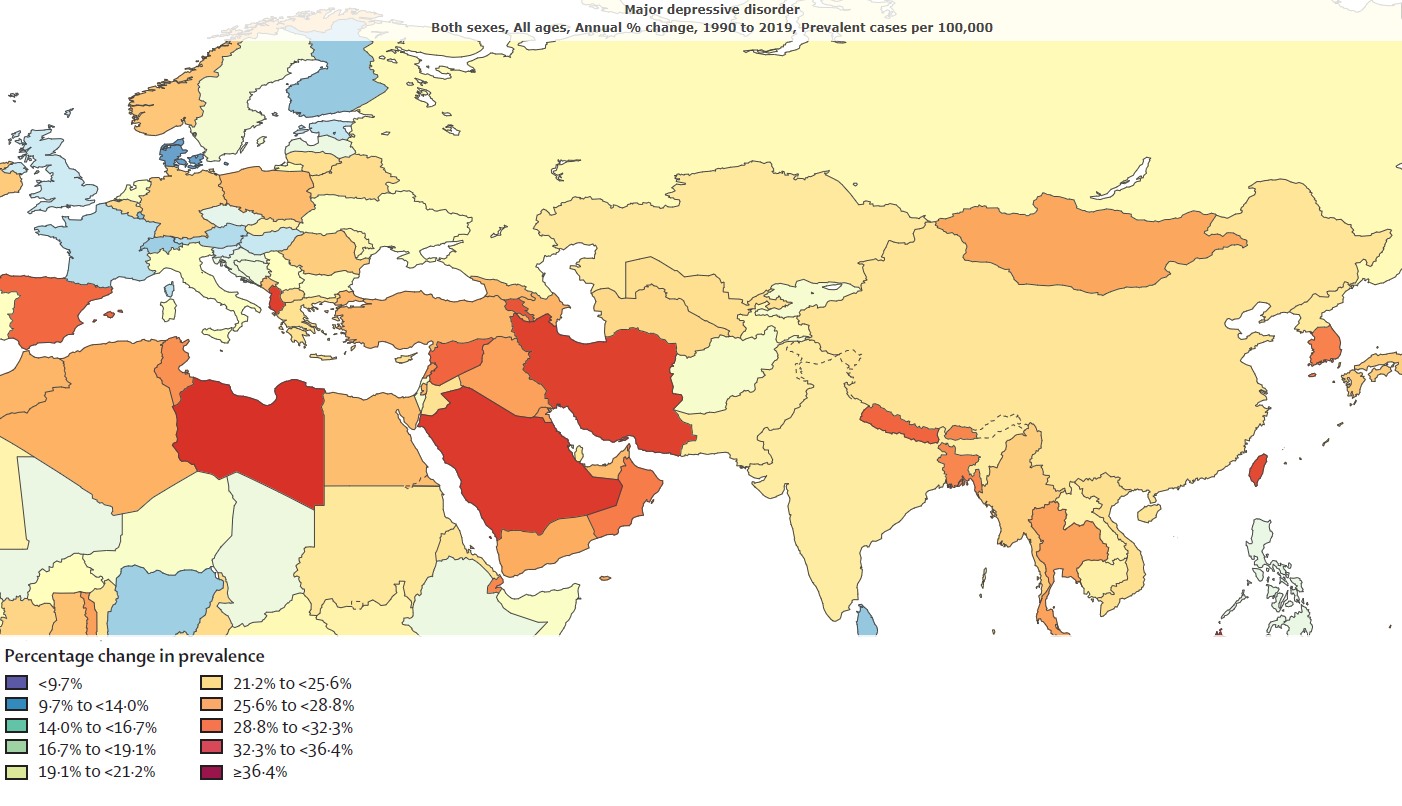


**Figure S4**. Annual % change of anxiety disorders per 100 000 persons due to the COVID-19 pandemic, 1990 versus 2019


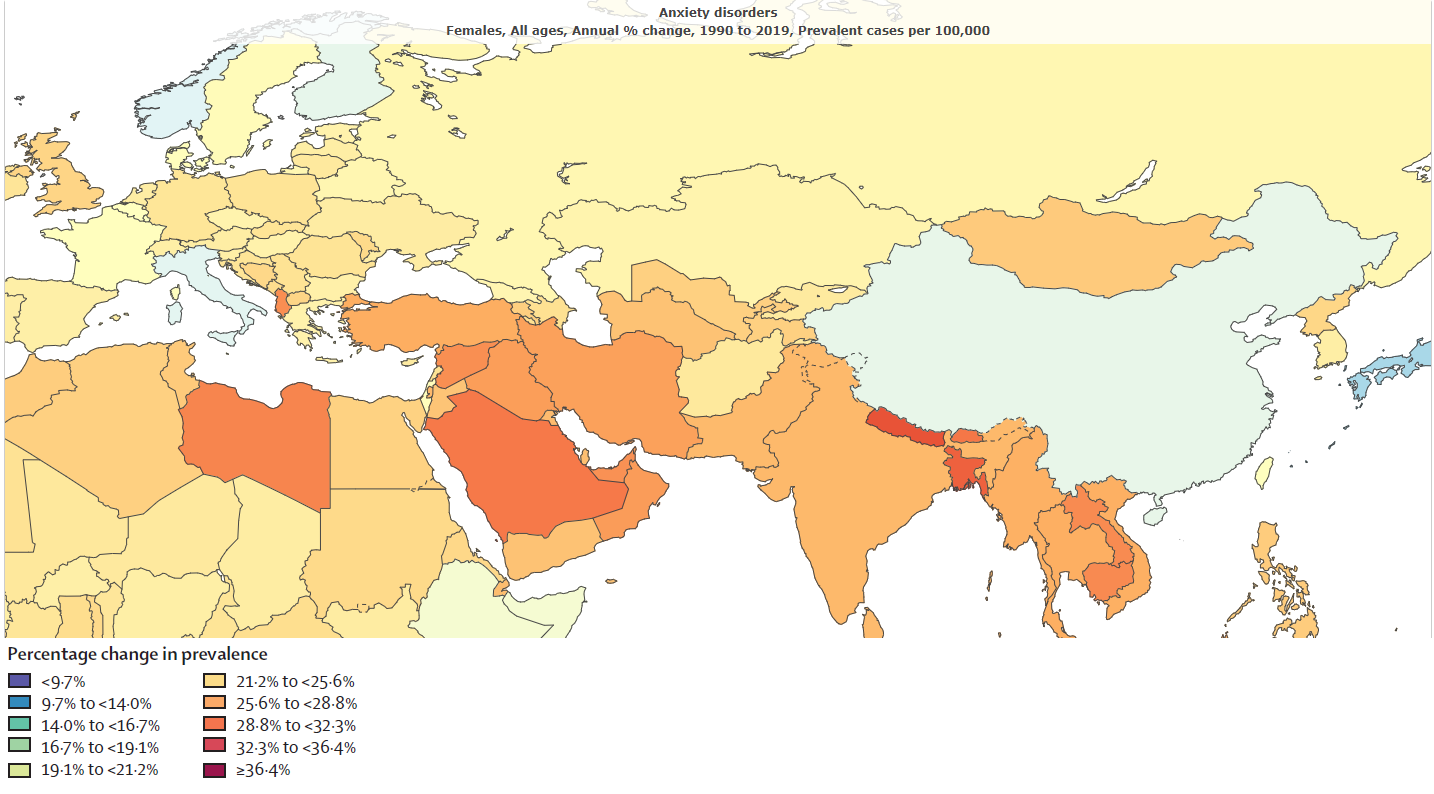


**Figure S5**. Pyramid illustration of the prevalence rate of Mental disorders per 100 000 persons due to the COVID-19 pandemic, 1990 versus 2019


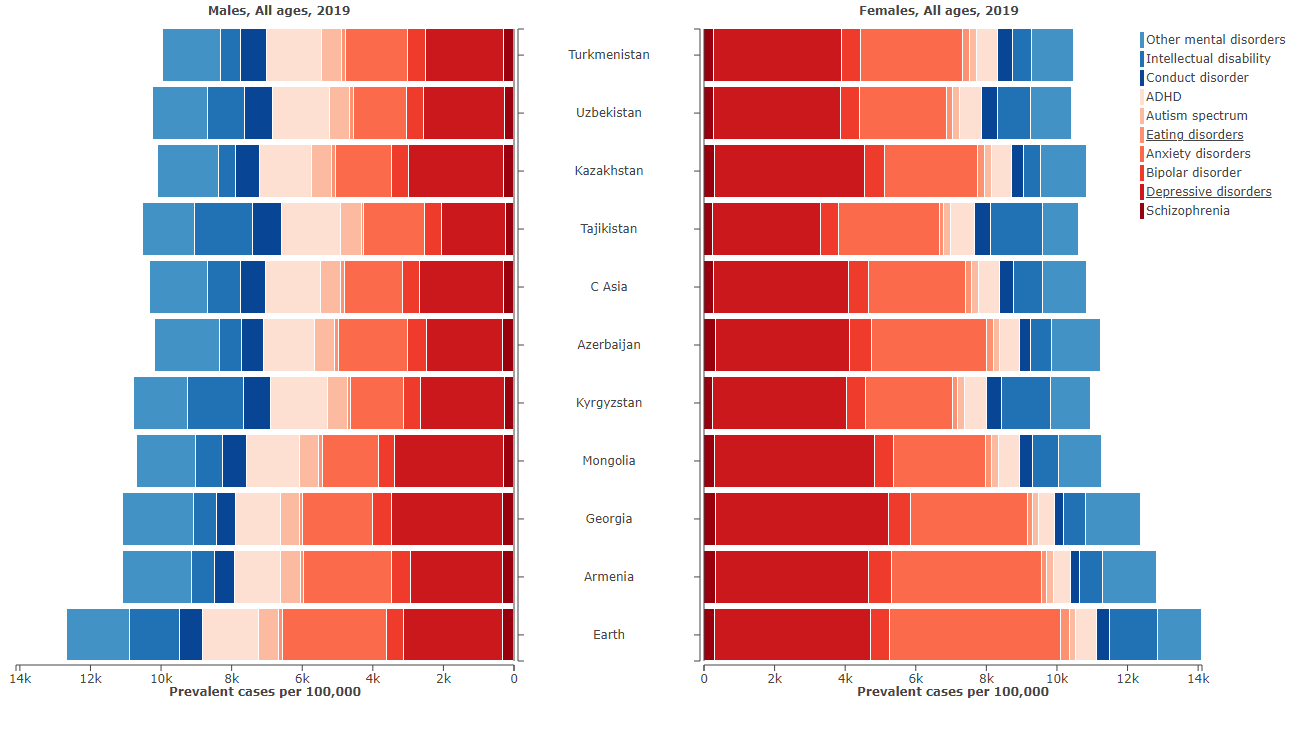


**Figure S6.** Pyramid illustration of the DALY rate of Mental disorders per 100 000 persons due to the COVID-19 pandemic, 1990 versus 2019


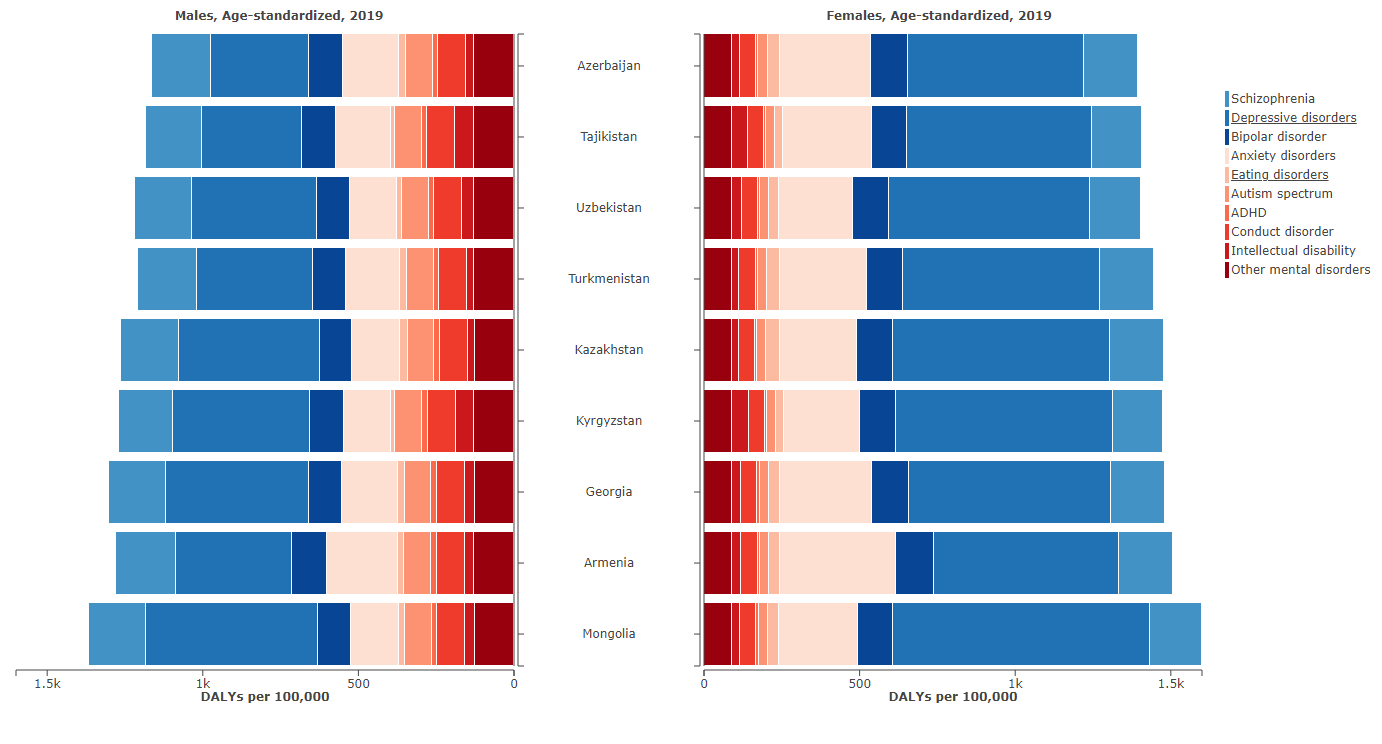


**Figure S7.** The trends of the prevalence rate of MDD per 100 000 persons due to the COVID-19 pandemic, both genders,1990 versus 2019


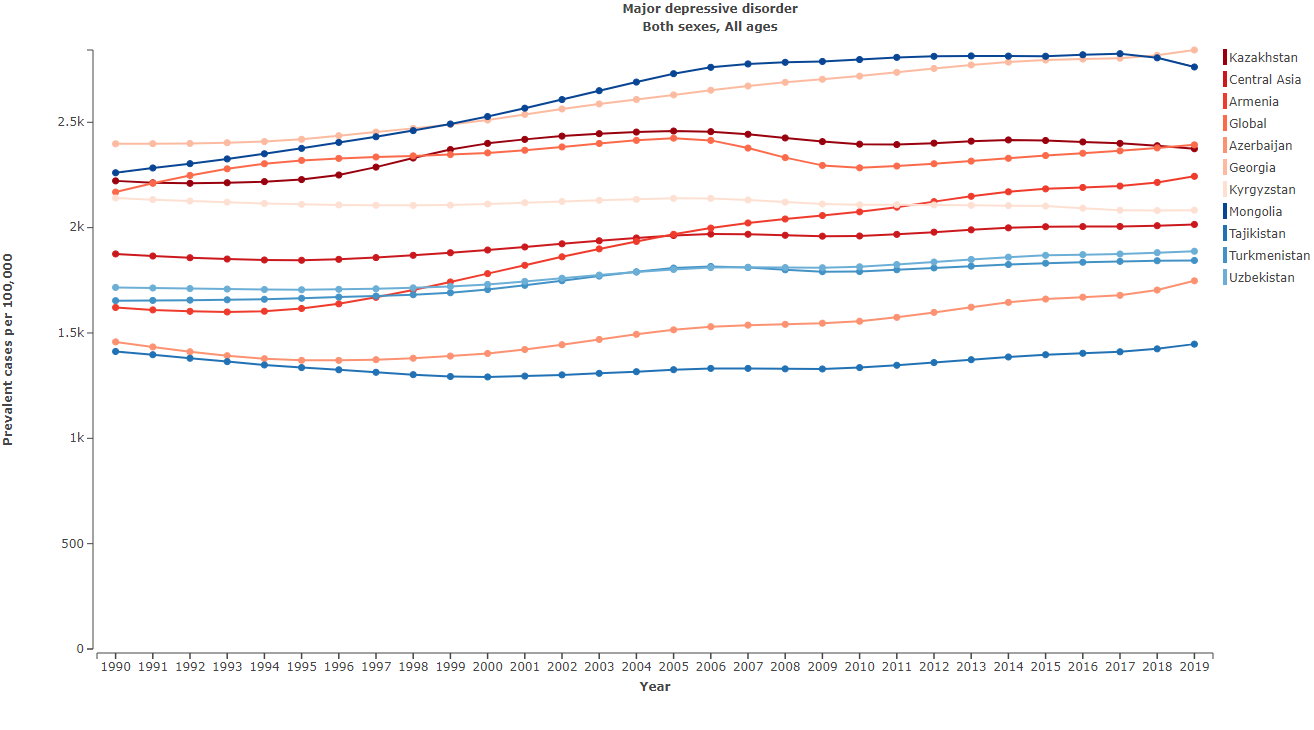


**Figure S8.** The trends of the prevalence rate of MDD per 100 000 persons due to the COVID-19 pandemic, Male gender,1990 versus 2019


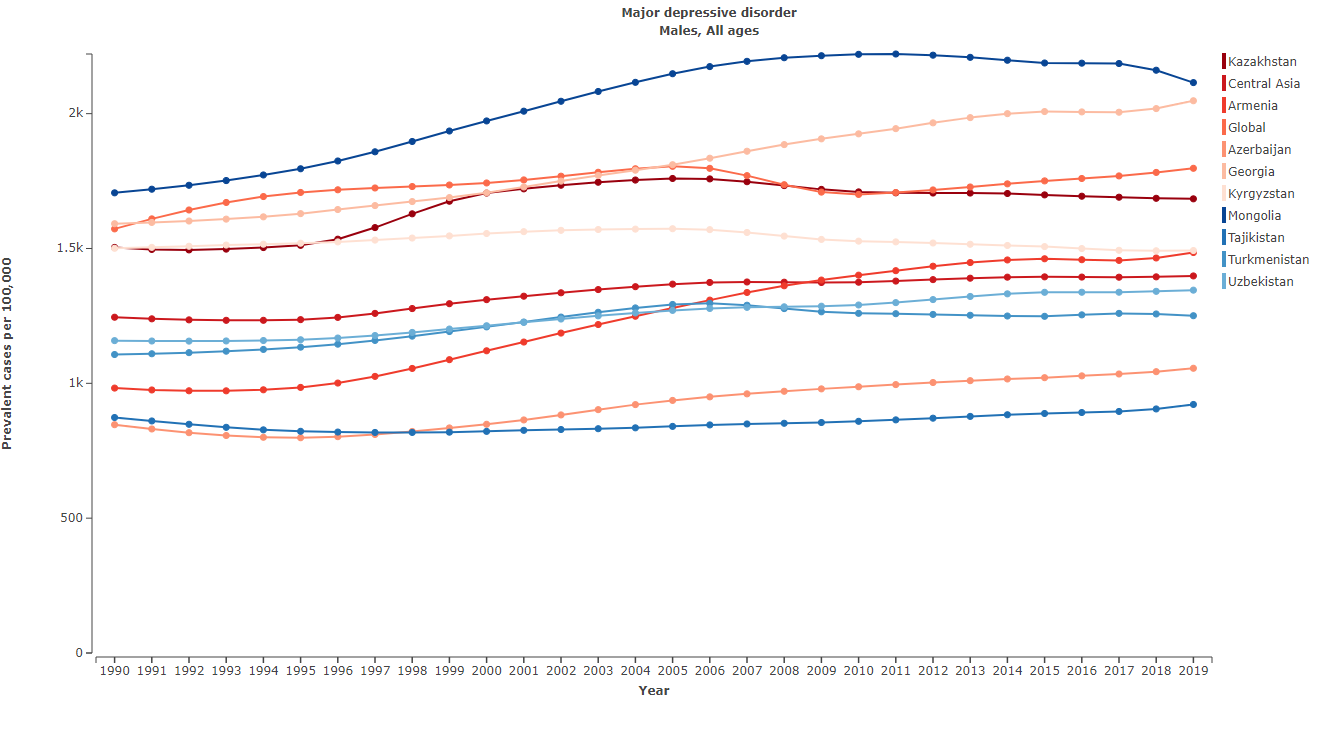


**Figure S9.** The trends of the prevalence rate of MDD per 100 000 persons due to the COVID-19 pandemic, Female gender,1990 versus 2019


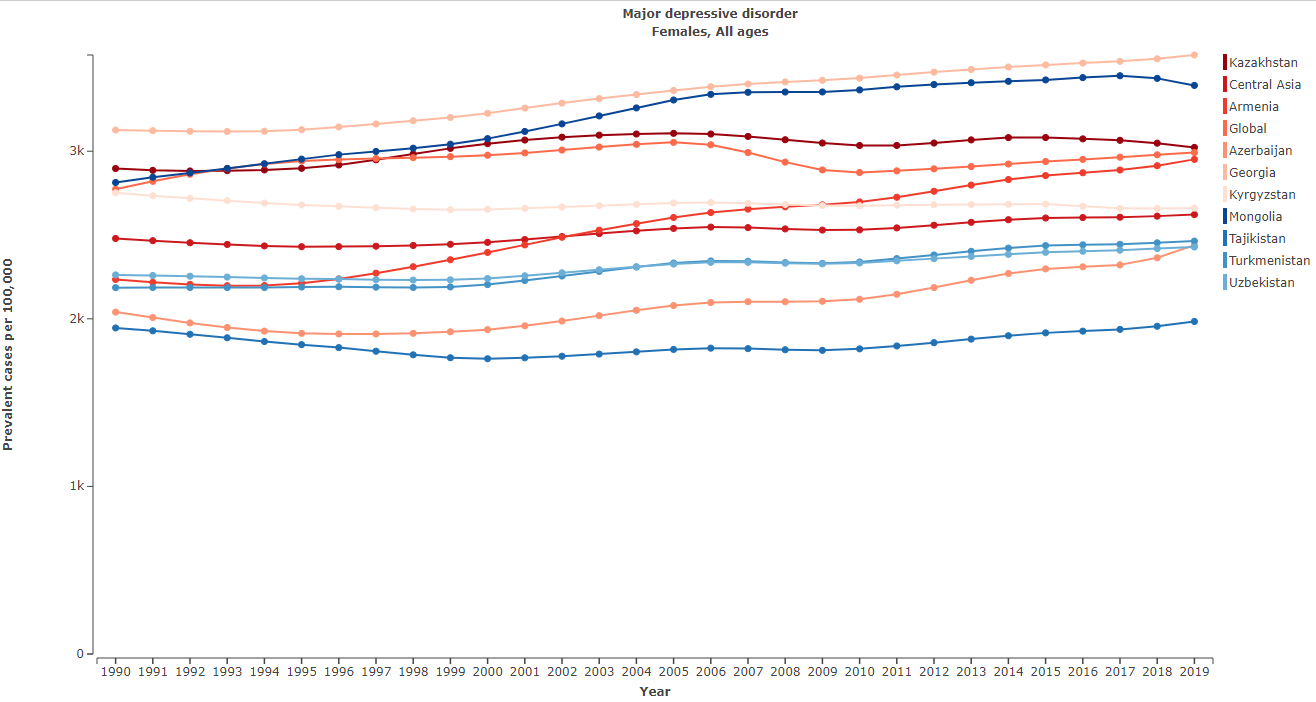


**Figure S10.** The trends of the prevalence rate of anxiety disorders per 100 000 persons due to the COVID-19 pandemic, both genders,1990 versus 2019


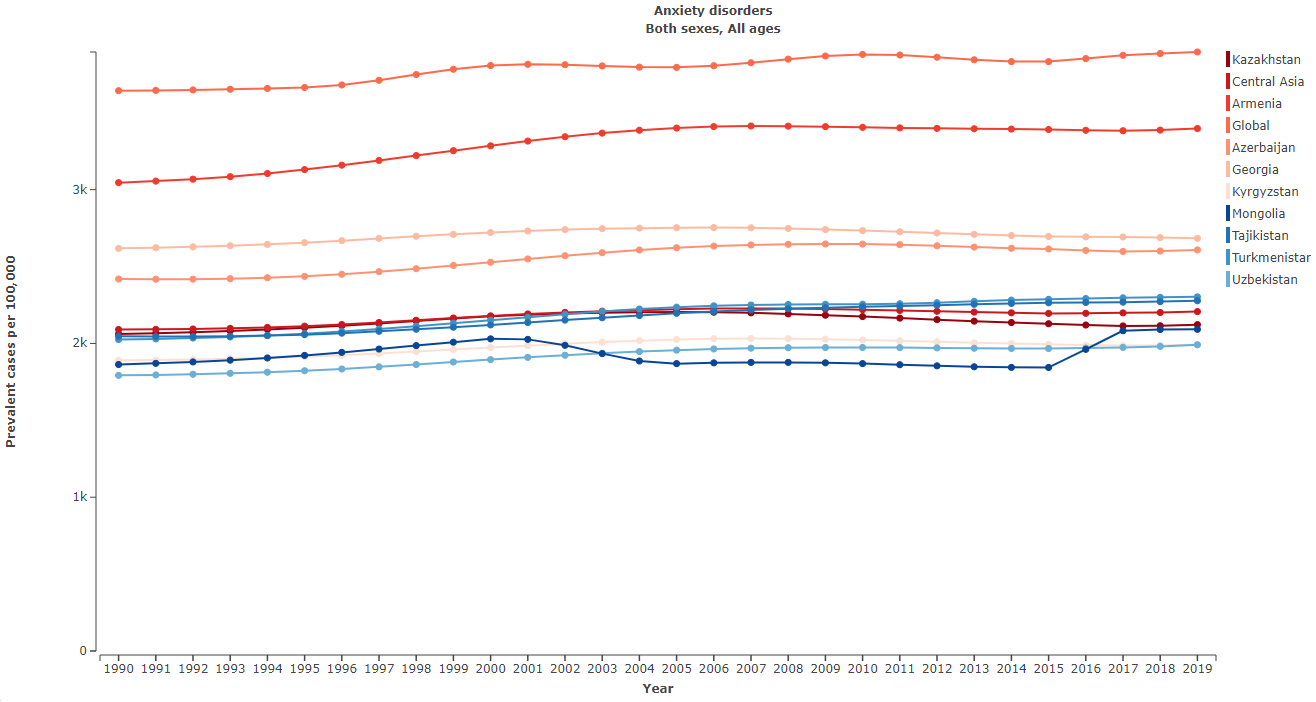


**Figure S11.** The trends of the prevalence rate of anxiety disorders per 100 000 persons due to the COVID-19 pandemic, Male gender,1990 versus 2019


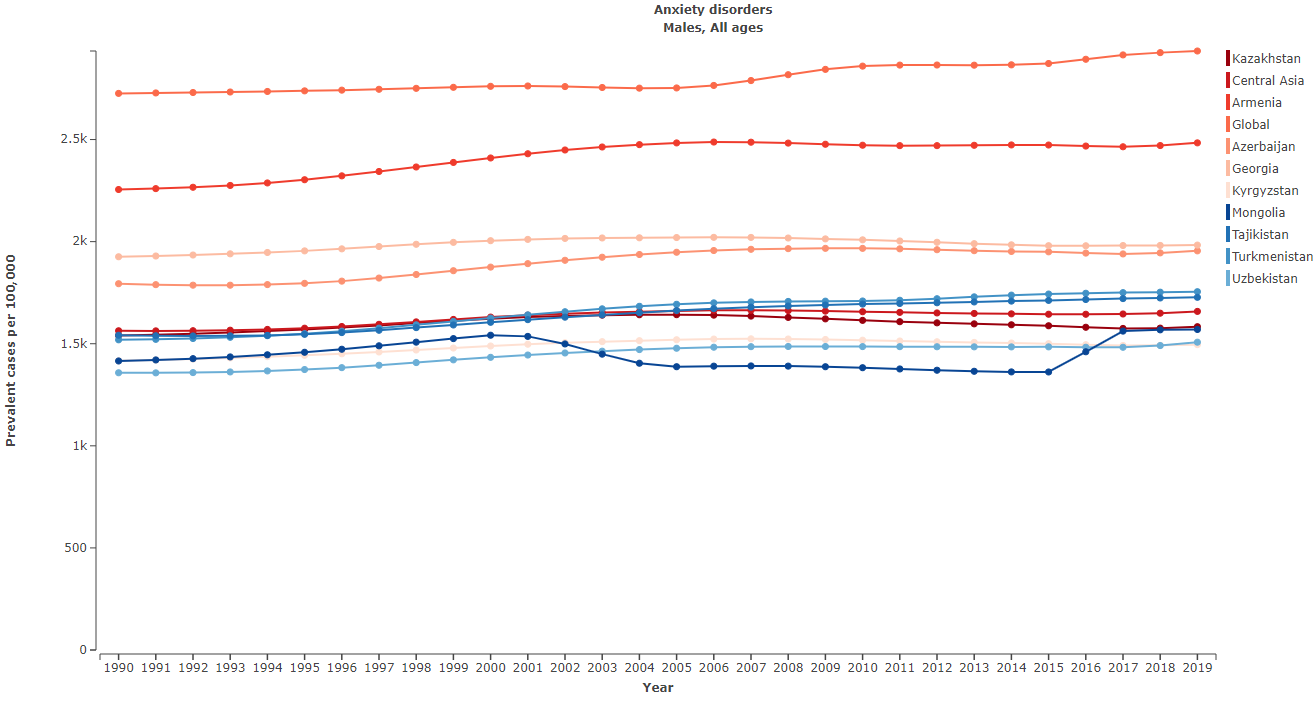


**Figure S12.** The trends of the prevalence rate of anxiety disorders per 100 000 persons due to the COVID-19 pandemic, Female gender,1990 versus 2019


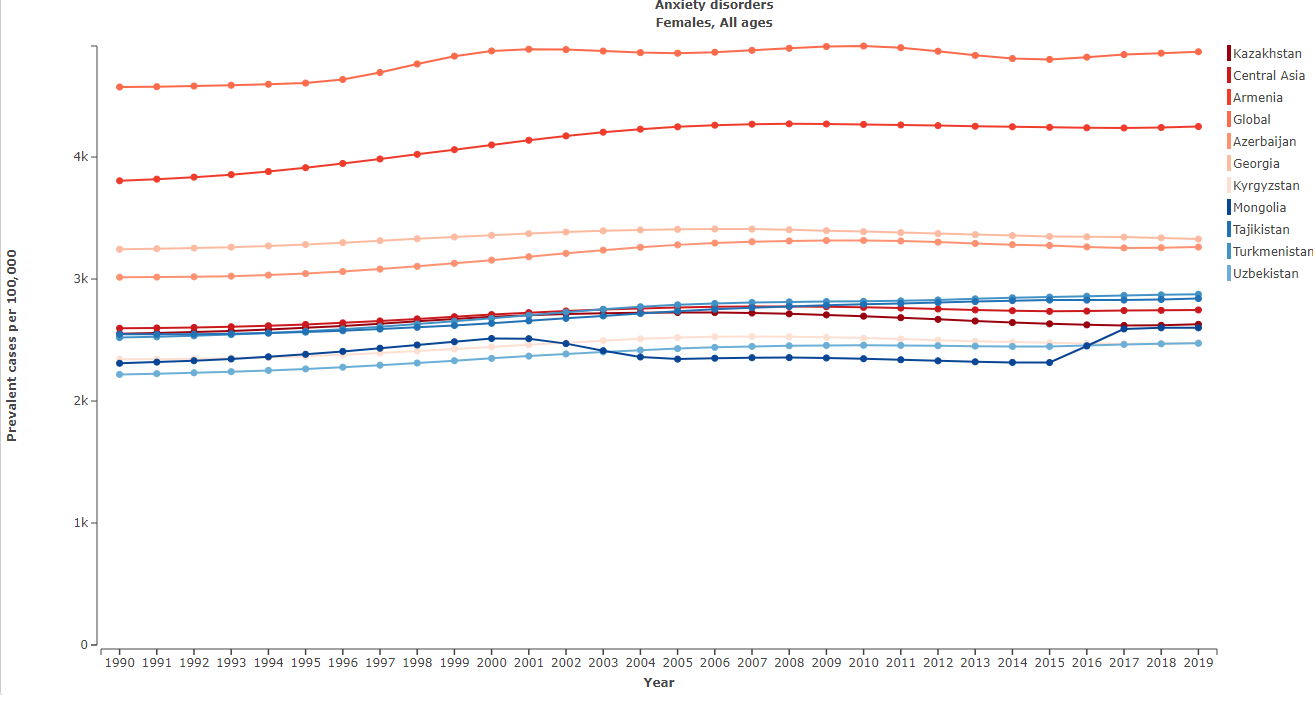

Supplement: Supplementary file 1 [file f5a49a425437e026fd83bd1e.docx]
